# Supplementary material for: EIN3 and ORE1 Accelerate Degreening during Ethylene-Mediated Leaf Senescence by Directly Activating Chlorophyll Catabolic Genes in Arabidopsis
Source: PLoS Genet. 2015 Jul 28;11(7):e1005399. doi: 10.1371/journal.pgen.1005399 (PMC4517869; doi:10.1371/journal.pgen.1005399)
Supplement: S1 Table — (XLSX) [file pgen.1005399.s008.xlsx]

## Sheet: EMSA
	Name	purpose	primer 5'-3'
	ORE1-EBS-F	EMSA	ATACTTTACAAGGTTCATGCATGCATAC
	ORE1-EBS-R	EMSA	GTATGCATGCATGAACCTTGTAAAGTAT
	ORE1-EBSm-F	EMSA	ATACTTTACAAGGGTAATGCATGCATAC
	ORE1-EBSm-R	EMSA	GTATGCATGCATTACCCTTGTAAAGTAT
	NYE1-EBS-F	EMSA	gtttaggtaagcaatacgaacctggataaacgaaatgc
	NYE1-EBS-R	EMSA	gcatttcgtttatccaggttcgtattgcttacctaaac
	NYE1-EBSm-F	EMSA	gtttaggtaagcaatTTTTTTTTggataaacgaaatgc
	NYE1-EBSm-R	EMSA	gcatttcgtttatccAAAAAAAAattgcttacctaaac
	NYC1-EBS-F	EMSA	taatttactcaggtacataagtaatgac
	NYC1-EBS-R	EMSA	gtcattacttatgtacctgagtaaatta
	NYC1-EBSm-F	EMSA	taatttactcaaaaaaaaaagtaatgac
	NYC1-EBSm-R	EMSA	gtcattacttttttttttgagtaaatta
	PAO-EBS-F	EMSA	gcttgaaataagattcatcagaagagta
	PAO-EBS-R	EMSA	tactcttctgatgaatcttatttcaagc
	PAO-EBSm-F	EMSA	gcttgaaataaaaaaaaacagaagagta
	PAO-EBSm-R	EMSA	tactcttctgtttttttttatttcaagc
	NYE1-OBS-F	EMSA	GTGGTTTCAGTGTACGAACACGCAAGAACTC
	NYE1-OBS-R	EMSA	GAGTTCTTGCGTGTTCGTACACTGAAACCAC
	NYE1-OBSm-F	EMSA	GTGGTTTCAAAGTACGAACAAACAAGAACTC
	NYE1-OBSm-R	EMSA	GAGTTCTTGTTTGTTCGTACTTTGAAACCAC
	NYC1-OBS-F	EMSA	gaggttgctgtaacgtgtggccatcacac
	NYC1-OBS-R	EMSA	gtgtgatggccacacgttacagcaacctc
	NYC1-OBSm-F	EMSA	gaggttAAAAAAAAAAAAAgccatcacac
	NYC1-OBSm-R	EMSA	gtgtgatggcTTTTTTTTTTTTTaacctc
	NOL-OBS-F	EMSA	agcttgctcgcttacgcaactctctctct
	NOL-OBS-R	EMSA	agagagagagttgcgtaagcgagcaagct
	NOL-OBSm-F	EMSA	agcttgctcgcttTTTcaactctctctct
	NOL-OBSm-R	EMSA	agagagagagttgAAAaagcgagcaagct
	PAO-OBS-F	EMSA	attgcatacttgcacgcaatctcttcttc
	PAO-OBS-R	EMSA	gaagaagagattgcgtgcaagtatgcaat
	PAO-OBSm-F	EMSA	attgcatacttgcTTTcaatctcttcttc
	PAO-OBSm-R	EMSA	gaagaagagattgAAAgcaagtatgcaat
	ACS2-OBS-F	EMSA	ggaattatgtggaggacgtacgtttatacatgtgcagactacaac
	ACS2-OBS-R	EMSA	gttgtagtctgcacatgtataaacgtacgtcctccacataattcc
	ACS2-OBSm-F	EMSA	ggaattatgtggaggaTTtTTgtttaAaAatgtgcagactacaac
	ACS2-OBSm-R	EMSA	gttgtagtctgcacatTtTtaaacAAaAAtcctccacataattcc

## Sheet: Luc
	Name	purpose	primer 5'-3'
	pORE1-LUC-F	Luc assay	CCCCTCGAGTACTTTTGAATGTATGCATC
	pORE1-LUC-R	Luc assay	TGGCGGCCGCTTTATCCTAATAGGGTTTCT
	pNYE1-LUC-F	Luc assay	ATAGGTACCTCTTCAGGTAGAGTTT
	pNYE1-LUC-R	Luc assay	ATAACTAGTCTCTGCTCTCTTGAAACC
	pNYC1-LUC-F	Luc assay	ATACTCGAGCTCAAATGTGACAATGGATACT
	pNYC1-LUC-R	Luc assay	GACTGCAGAGCTATGGAAGAAGAGTGAGAT
	pNOL-LUC-F	Luc assay	ATACTCGAGTTGAATCTCTGTAGGTTTTTTC
	pNOL-LUC-R	Luc assay	GACTGCAGTACAGAAGCTCAAAGAGAGAGA
	pPAO-LUC-F	Luc assay	GACTCGAGGAAGAAACTGTTTTCATGATCT
	pPAO-LUC-R	Luc assay	ATACTGCAGTTTTCTAGTTTGGTTTGTTGG
	pACS2-LUC-F	Luc assay	CTGCTCGAGagagtccaaacccaccaact
	pACS2-LUC-R	Luc assay	CGAGCTGCAGttgctgtgtcaattctcacttctt

## Sheet: qPCR
	Name	purpose	primer 5'-3'
	pri-miR164A	RT-qPCR	cagcacacacacacacacac
	pri-miR164A	RT-qPCR	cgcatttccaagcacatgag
	ORE1-F	RT-qPCR	ACGAGGCATCAAGAATCGTC
	ORE1-R	RT-qPCR	TCACCAATGGCAGTAGCAGA
	NYE1-F	RT-qPCR	AGTGGCGTTTTGTTCTGTTGTT
	NYE1-R	RT-qPCR	AACAACCTTGCAACGGGAAC
	NYC1-F	RT-qPCR	TATAACCGGAAGGGGACTAGGG
	NYC1-R	RT-qPCR	TTCGACAGCTTCTCAACGTCT
	NOL-F	RT-qPCR	GATGGGAGACCAACACCCAG
	NOL-R	RT-qPCR	TTGTGACCATTCCAGGCGAT
	PAO-F	RT-qPCR	GGTGGCAGGTTGTACCAAGA
	PAO-R	RT-qPCR	CTGCCTGGGTTGGAGTGAAT
	PPH-F	RT-qPCR	TTGGCGTTGGTTCATTTCAC
	PPH-R	RT-qPCR	TCAGCCCACGGTTCAGTTTT
	HCAR-F	RT-qPCR	CGGTACTCGTTGGACTACCAT
	HCAR-R	RT-qPCR	CTATTTGGCCGTTTTTTGTTGT
	RCCR-F	RT-qPCR	CGCCGAAAATTTATGGAGTT
	RCCR-R	RT-qPCR	AGGGAAGGAGTTGTGATTGG
	ACS2-F	RT-qPCR	AAATTAACCGTTGACGCCGC
	ACS2-R	RT-qPCR	CTTCCTCGTGACAAACCGGA
	ACT2-F	RT-qPCR	GGCTCCTCTTAACCCAAAGGC
	ACT2-R	RT-qPCR	CACACCATCACCAGAATCCAG

## Sheet: ChIP
	Name	purpose	primer 5'-3'
	NYE1-F	ChIP-qPCR	ttcaagcaatcatcaagcaaagg
	NYE1-R	ChIP-qPCR	ttttcacgcgagttcttgcg
	NYC1-F	ChIP-qPCR	taggctaacgagatgaggttgc
	NYC1-R	ChIP-qPCR	agtgatcggaggaagaagaagg
	NOL-F	ChIP-qPCR	catcttatatgccgccacgtg
	NOL-R	ChIP-qPCR	ACATTTGAGACGGAGGAAGACC
	PAO-F	ChIP-qPCR	gcatacttgcacgcaatctc
	PAO-R	ChIP-qPCR	gtttggtttgttggattttgatg
	ACS2-F	ChIP-qPCR	tgaaatcaaattcctcaacactc
	ACS2-R	ChIP-qPCR	catttggtatgttgtagtctgcac
	BFN1-F	ChIP-qPCR	CATGACACATGGATGATGCTGT
	BFN1-R	ChIP-qPCR	CATTGCGAGTCTCATACGTTCC
	Control-F	ChIP-qPCR	TGACGCCATTCCCAACAATG
	Control-R	ChIP-qPCR	CAAGCAGCTCAACCTCTACAAC

## Sheet: Transgene
	Name	purpose	primer 5'-3'
	NYE1iox-F	Transgene	CATCTCGAGATGTGTAGTTTGTCGGCGAT
	NYE1iox-R	Transgene	CCACTAGTTAAGCGTAATCTGGAACATCGTATGGGTAGAGTTTCTCCGGATTTGG
	EIN3-pEeargate203-F	Transgene	GGGGACAAGTTTGTACAAAAAAGCAGGCTTCATGATGTTTAATGAGATGGGAA
	EIN3-pEeargate203-R	Transgene	GGGGACCACTTTGTACAAGAAAGCTGGGTCCTATTAGAACCATATGGATACATCT
